# Supplementary material for: Intrinsically Disordered Linkers Impart Processivity on Enzymes by Spatial Confinement of Binding Domains
Source: MDPI journal article supplement (doi:10.3390/ijms20092119), 2019-04-29
Supplement: s1 [file s1]

# 1 Intrinsically Disordered Linkers Impart Processivity 2 on Enzymes by Spatial Confinement of Binding 3 Domains

4

## 5 Supplementary material

### 6 Supplementary methods

#### 7 Statistical-kinetic modeling of disordered linkers

8 To address the statistical-kinetic behavior of a domain-linker-domain (DLD) protein enabled by the  
9 linker region, we applied a Gaussian approximation of the Freely Jointed Chain (FJC) model, as  
10 described in the literature [1, 2], either for a general DLD enzyme, or for the cellulase enzyme Cel7A.  
11 According to recommendation in the literature [3] the Gaussian approximation shows only minor  
12 deviation in the distribution probability curves from the exact solution and can be used for most cases  
13 (Suppl. Figure S1). For clarity and reproducibility, we recite the major features of this modeling,  
14 which allows the computation of the spatial distribution of endpoints of a FJC.

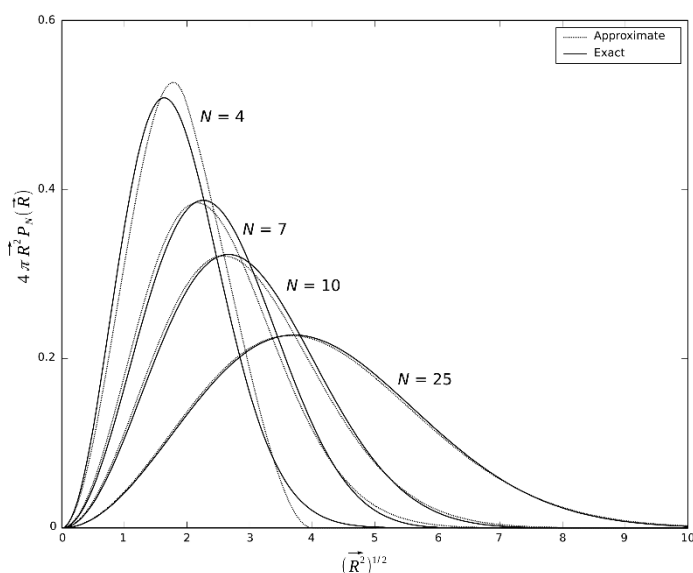

15

#### 16 Figure S1 Gaussian approximation of the FJC model

17 Comparison between the exact solution (solid line) and the Gaussian approximation (dashed line) of  
18 the FJC model of the spatial distribution of the free binding domain around the tethered domain  
19 bound to the substrate (at  $x = 0$ ). The modeling is done at different linker lengths measured in Kuhn  
20 segment units (from  $N = 4$  to  $N = 25$ ). For details, cf. ref [3].

21

22 To describe geometrical positions, let us have our Cartesian coordinate system's X axis point along a  
23 substrate chain, Y "upwards", while Z completes the XZ plane that would cover a substrate sheet.

24

25 Let  $\vec{R}$  denote the end-to-end vector of the polypeptide chain, the probability density of  $\vec{R}$  for an N  
26 segment chain is  $\rho_N(\vec{R})$ .

$$27 \quad \rho_N(\vec{R}) = \left(\frac{3}{2\pi Nl_k^2}\right)^{\frac{3}{2}} \exp\left(\frac{-3\vec{R}^2}{2Nl_k^2}\right). \quad (\text{Eq. S1})$$

28

29 If needed, the chain can be calculated as 2 or more subsections as

30

$$31 \quad \rho_{N_1, N_2}(\vec{R}) = \int \rho_{N_1}(\vec{R}_1) \rho_{N_2}(\vec{R} - \vec{R}_1). \quad (\text{Eq. S2})$$

32

33 The time required for computations rises exponentially with the number of segments, which  
34 rationalizes the use of the much faster gaussian approximation, despite its minor deviation from the  
35 analytical solution of FJC for linkers of very small or very large number of segments. It is to be noted  
36 that although in ATP-driven dimeric motors the description has been developed for two linkers, it is  
37 adequate for the description of a single linker in the monomeric DLD-type enzymes studied here.

38 As a first approximation, we may consider the two binding elements (domains in the DLD  
39 arrangement) as points with no physical extension, but in more realistic modeling we may also take  
40 into account the geometry of the protein domains, and positions of the binding sites (targets) on the  
41 substrate. While in the FJC model the individual Kuhn segments may freely overlap, we want to

42 restrict  $\vec{R}$  so that it respects the dimensions of the domains and substrate. We approximate the  
43 domains as simple spheres, and the substrate as a line or sheet with discrete binding elements.

44 The integral of a probability density function should always be 1.0, therefore if we exclude volumes  
45 we need to modify the function as:

46

$$47 \quad \rho_N^* = \frac{\rho_N(\vec{R})\Theta(\vec{R})}{\int \rho_N(\vec{R})\Theta(\vec{R})d\vec{R}} \quad (\text{Eq. S3})$$

48

49 where  $\Theta$  is the exclusion function such as:

50

$$51 \quad \Theta(\vec{R}) = \begin{cases} 0 & \text{if } R < r_{D1} + r_{D2} \\ 1 & \text{otherwise} \end{cases} \quad (\text{Eq. S4})$$

52

53  $\Theta$  can be more or less complex as the desired model requires, e.g. when a sheet-like substrate is  
54 considered.

55 A further refinement of the model is that part of the linker may also bind to the domain from which  
56 it originates (termed the tethering domain). In this case the probability density function changes to

57

$$58 \quad \rho_{N_D}^* = \frac{\rho_{N_D}(\vec{R}-\vec{R}_D)\Theta(\vec{R})}{\int \rho_{N_D}(\vec{R}-\vec{R}_D)\Theta(\vec{R})d\vec{R}} \quad (\text{Eq. S5})$$

59

60 Probability of docked and undocked states are denoted as  $P(N_D)$ , and  $P(N)$  respectively. Then

61

$$62 \quad \frac{P(N_D)}{P(N)} = e^{(-\Delta G/k_B T)} \quad (\text{Eq. S6})$$

63

64 gives the ratio of bound and unbound states. A  $\Delta G$  of  $-2k_B T$ , as in the case of kinesin, used as a  
65 reference, yields roughly 85% bound state. The approximation is rationalized by the notion that the  
66 amino acid composition and the length of the linker segments in the DLD type enzymes are roughly  
67 comparable to the same parameters in kinesin.

68 The probability density function then describes the local concentration of the free end of the chain as:

69

$$70 \quad 1 \text{particle} * \rho_N(\vec{R}) \text{ nm}^{-3} \quad (\text{Eq. S7})$$

71

72 which can be converted to molar concentration:

73

$$74 \quad 1\text{particle} * \text{nm}^{-3} = 1.6605M \quad (\text{Eq.S8})$$

75

76 Let  $c_N$  be the local molar concentration of the undocked chain, and  $c_{N_D}$  that of the docked ones, then  
77 the time of binding to a target (binding) site is:

78

$$79 \quad t_{on} = \frac{1}{k_{on}(P(N)c_N + P(N_D)c_{N_D})}. \quad (\text{Eq.S9})$$

80

81 To calculate binding times for several discrete targets, we can calculate the individual local  
82 concentration at each site as  $c_{N_1}, c_{N_2} \dots c_{N_n}$ . Let us define  $c_{N_1} \equiv c_1$  and  $c_{N_{D_1}} \equiv c_1^*$ . Then the  
83 aggregate binding time is:

84

$$85 \quad t_{on} = \frac{1}{k_{on}(P(N)[c_1 + c_2 + c_3 \dots + c_n] + P(N_D)[c_1^* + c_2^* + c_3^* \dots + c_n^*])} \quad (\text{Eq. S10})$$

86

87 By calculating the average binding times, we can demonstrate processivity of the enzyme by showing  
88 that the free domain will find a new substrate binding site in significantly shorter time than it takes  
89 for the tethered domain to dissociate or catalyze a reaction. As (re)binding at a new binding site will  
90 in this case be preferred over dissociation, the enzyme will behave processively, and its level of  
91 processivity (the number of steps taken before falling off the substrate) can be approximated as the  
92 ratio of times of binding vs. dissociation ( $t_b/t_d$ ).

93

#### 94 *Calculation of charge distribution of linkers*

95 Charge distribution (Figure S3) of linkers was calculated using the Classification of Intrinsically  
96 Disordered Ensemble Regions (CIDER) webserver developed by the Pappu lab  
97 (<http://pappulab.wustl.edu/CIDERinfo.html>) [4]. The diagram is generated by the algorithm by  
98 plotting the fraction of negatively charged residues vs. the fraction of positively charged residues,  
99 giving a simple way to classify IDPs according to their conformational properties.

100

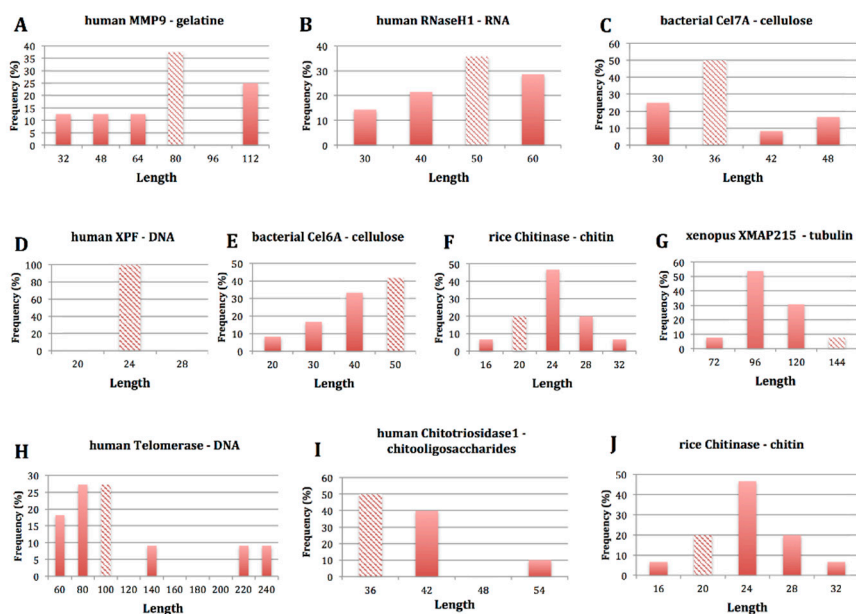

101

102 **Figure S2** Length distribution of linkers in DLD processive enzymes

103 Length distribution was calculated for every DLD processive linker in Table 1, considering their  
 104 homologues used for evolution and conservation studies (Suppl. Table S2). Length is shown in the  
 105 number of amino acids. The striped column represent the linker length of the actual processive  
 106 enzyme listed in Table 1, whereas columns of full colors give distribution of homologues.

107

108

109

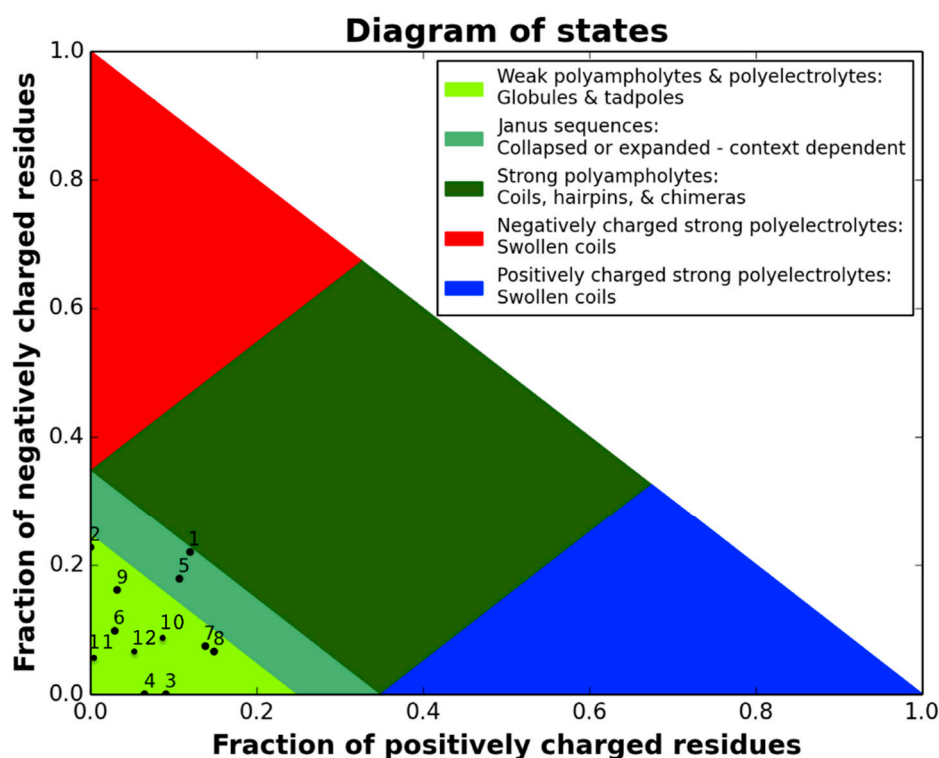

110

111

112 **Figure S3** Graphical representation of the charge distribution of the DLD linkers

113 The charge distribution of linkers was calculated by the CIDER server as described in Suppl. methods.

114 The light green area corresponds to weak polyampholytes or weak polyelectrolytes that form rather

115 compact conformations. The dark green area corresponds to strong polyampholytes that form coil-

116 or hairpin-like structures. The boundary between the two green regions represents a continuum of

117 possibilities between these two states that lends a context-dependent nature to the sequences. Areas

118 of blue and red correspond to either positively (blue) or negatively (red) charged strong

119 polyampholytes that form swollen coil structures. The numbers correspond to the DLD type

120 processive enzyme linkers in Table 1.

121

122 **Table S1**

123 Processive proteins and enzymes have been identified by text search in literature for “processive”

124 and “processivity”. In principle, the proteins can be grouped into two major categories and four

125 substrate-categories, as follows. 1) Enzymes relying on structural confinement, such as: i) complexes

126 with subunits that surround the substrate and ii) enzymes with asymmetric active-site cavities, and

127 2) enzymes relying on spatial confinement, such as: iii) dimeric mechanochemical motors and iv)

128 monomeric processive enzymes of domain-linker-domain (DLD) architecture. As these categories  
 129 cannot always be clearly separated, they are not indicated, but important parameters relating to the  
 130 possible mechanism, such as subunit structure, the presence of active-site cleft, length and disorder  
 131 of linker, the measure of processivity (average number of rounds of modification/steps taken before  
 132 dissociation) are given.  
 133

| Protein Name                                | Structural characteristics |                          |         |        |                      | Partner     | Linker length | Processivity         |
|---------------------------------------------|----------------------------|--------------------------|---------|--------|----------------------|-------------|---------------|----------------------|
|                                             | ATP                        | Complex                  | Channel | Groove | Domain-Linker-Domain |             |               |                      |
| <i>Yeast</i> 40S Ribosome                   | +                          | +                        | +       | -      | -                    | RNA         | -             | >1700 nucleotids     |
| <i>T. acidophilum</i> 20S Proteasome        | +                          | +                        | +       | -      | -                    | Polypeptide | -             | ~140                 |
| <i>Yeast</i> RNAP II                        | +                          | +                        | +       | -      | -                    | dsDNA       | -             | 1000000              |
| T7 gp4 helicase                             | +                          | +                        | +       | -      | -                    | dsDNA       | -             | 40000                |
| E1 helicase                                 | +                          | +                        | +       | -      | -                    | dsDNA       | -             | >3000 nucleotids     |
| T7 DNA helicase                             | +                          | +                        | +       | -      | -                    | dsDNA       | -             | 75000 bp             |
| T7 DNA polymerase                           |                            | dimer (gp5 and trx prot) | +       | +      | -                    | dsDNA       | -             | 17±3 kb              |
| <i>Human</i> Upf1                           | +                          | +                        | -       | -      | -                    | mRNA        | -             | > 10 kb              |
| PCNA (in <a href="#">DNA polymerase δ</a> ) | -                          | homotrimer               | +       | -      | -                    | dsDNA       | -             | >13000               |
| <i>V. Virus</i> Uracil DNA glycosylase      | -                          | 3 subunit                | -       | +      | -                    | dsDNA       | -             | 1500-2000 nucleotids |
| <i>E. Coli</i> β-protein                    | +                          | +                        | +       | -      | -                    | dsDNA       | -             | >5000                |
| T4 gp45                                     | +                          | +                        | +       | -      | -                    | dsDNA       | -             | >20000               |
| <i>Human</i> Pol γ                          | -                          | 3 subunit                | +       | -      | -                    | ssDNA       | -             | 2250±162             |
| <i>Bacteriophage</i> λ exonuclease          | -                          | 3 subunit                | +       | -      | -                    | dsDNA       | -             | ~3000                |
| <i>E.Coli</i> PNPase (in RNA degradosome)   | -                          | +                        | +       | -      | -                    | ssRNA       | -             |                      |
| <i>S. antibioticus</i> PNPase               | -                          | +                        | +       | -      | -                    | ssRNA       | -             |                      |
| <i>T. reesei</i> Cel7A                      | -                          | -                        | -       | +      | +                    | cellulose   | 24 aa         | 20-90 acts           |
| <i>H. insolens</i> Cel6A                    | -                          | -                        | -       | +      | +                    | cellulose   | 52 aa         |                      |
| <i>C. cellulolyticum</i> Cel48F             | -                          | -                        | -       | +      | +                    | cellulose   | 49 aa         |                      |
| <i>C. phytofermentans</i> Cel48             | -                          | -                        | -       | +      | n.a.                 | cellulose   |               | 3,5-6 acts           |

|                                                        |   |   |   |   |   |                        |        |                |
|--------------------------------------------------------|---|---|---|---|---|------------------------|--------|----------------|
| <b>Cellulase E4</b>                                    | - | - | - |   |   | cellulose              |        |                |
| <i>D. melanogaster</i><br><b>Kinesin-1</b>             | + | - | - | - | + | microtubule            | 31 aa  | 1747 ± 199 nm  |
| <i>Mouse</i> <b>Kinesin-2</b>                          | + | - | - | - | + | microtubule            | 17 aa  | 449 ± 30 nm    |
| <i>Neurospora crassa</i> <b>Kin-3</b>                  | + | - | - | - | + | microtubule            | 22 aa  | 2.14±0.29 µm   |
| <i>Mouse</i> <b>Dynein</b>                             | + | - | - | - | + | microtubule            | 204 aa | 339 ± 33 nm    |
| <i>Gallus gallus</i> <b>Myosin V</b>                   | + | - | - | - | + | actin                  | 64 aa  | 2.2±0.2 µm     |
| <i>Human</i> <b>Myosin VI</b>                          | + | - | - | - | + | actin                  | 62 aa  | 796±639 nm     |
| <i>Xenopus</i> <b>Centrosome protein E</b>             | + | - | - | - | + | microtubule            | 12 aa  | 2.6± 0.2 µm    |
| <i>Human</i> <b>XPF</b>                                | - | - | - | - | + | DNA                    | 22 aa  | 60 nt          |
| <i>Sulf. solfataricus</i> <b>XPF</b>                   | - | - | - | - | + | DNA                    | 19 aa  | 12 nt          |
| <i>Staph. aureus</i> <b>Helicase PcrA</b>              | + | - | - | + | - | dsDNA                  | -      | 20             |
| <i>E.Coli</i> <b>Exonuclease I</b>                     | - | - | + | - | - | ssDNA                  | -      | >900           |
| <i>S. cerevisiae</i> <b>Mip1</b>                       | - | - |   |   |   | ssDNA                  |        | 480±20 nt      |
| <i>HIV</i> <b>Reverse transcriptase</b>                | - | - | - | + | - | ssDNA, ssRNA           | -      | <50            |
| <i>Human</i> <b>Telomerase</b>                         | - |   |   |   |   | DNA                    | 94 aa  |                |
| <b>AP-endonuclease-1</b>                               | - | - | - | + | - | dsDNA                  | -      | 200 nucl.      |
| <i>Human</i> <b>MMP9</b>                               | - |   |   |   |   | gelatine               | 76 aa  |                |
| <b>T7 RNA polymerase</b>                               |   | - |   | + |   | dsDNA                  |        | thousands      |
| <i>Mouse</i> <b>Formin (mDia1)</b>                     | - |   |   |   |   | actin                  | 23 aa  | 2600 subunits  |
| <i>S. cerevisiae</i> <b>Formin (Bni1)</b>              | - |   |   |   |   | actin                  | 17 aa  | 12000 subunits |
| <i>Xenopus</i> <b>XMAP215</b>                          | - |   |   |   |   | tubulin                |        | 25 tub. dimer  |
| <i>C. thermocellum</i> <b>1,4-beta-glucanase</b>       | - |   |   |   |   | cellulose              | 103 aa |                |
| <i>Human</i> <b>Chitotriosidase-1</b>                  | - |   |   |   |   | chitoooligosaccharides | 31 aa  | 8.6±1.1        |
| <i>Bacillus circulans</i> <b>Chitinase A1</b>          | - |   |   |   |   | crystalline-chitin     | 23 aa  |                |
| <i>Oryza sativa subsp. Japonica</i> <b>Chitinase 2</b> | - |   |   |   |   | chitin                 | 17 aa  |                |



|                       |   |  |  |  |  |         |        |  |
|-----------------------|---|--|--|--|--|---------|--------|--|
| <i>Human Nedd4-1</i>  | - |  |  |  |  | protein | 322 aa |  |
| <i>Human RNase H1</i> | - |  |  |  |  | RNA     | 64 aa  |  |

134

135

136 **Table S2**

137 Orthologues of the proteins in Table 1 were selected in different species where similar proteins were  
 138 annotated. In each case the protein with highest similarity (at least 90 % homology) was chosen for  
 139 analysis. Please note that for two enzymes from Table 1 (*C. cellulolyticum* Cel48F and *C.*  
 140 *thermocellum* 1,4-beta-glucanase) are omitted because we did not found a sufficient number of  
 141 homologues to carry out proper conservation analysis.

142

| <b>Human MMP9</b> | <b>Human RNaseH1</b>   | <b>Human XPF</b>   | <b>Bacterial cellulase 7A</b> | <b>Bacterial cellulase 6A</b> |
|-------------------|------------------------|--------------------|-------------------------------|-------------------------------|
| Homo sapiens      | Homo sapiens           | Homo sapiens       | Hypocrea jecorina             | Humicola insolens             |
| Pan troglodytes   | Pan troglodytes        | Pan troglodytes    | Penicillium marneffeii        | Corynascus sepedonium         |
| Canis familiaris  | Canis familiaris       | Canis familiaris   | Fusarium oxysporum            | Chaetomium thermophilum       |
| Mus musculus      | Mus musculus           | Bos taurus         | Talaromyces stipitatus        | Valsa mali                    |
| Bos taurus        | Bos taurus             | Mus musculus       | Magnaporthiopsis poae         | Nectria haematococca          |
| Danio rerio       | Gallus gallus          | Gallus gallus      | Neosartorya fischeri          | Colletotrichum graminicola    |
| Gallus gallus     | Xenopus tropicalis     | Xenopus tropicalis | Gibberella moniliformis       | Trichoderma atroviride        |
| Takifugu rubripes | Tetraodon nigroviridis | Takifugu rubripes  | Aspergillus niger             | Hypocrea jecorina             |
|                   | Danio rerio            | Danio rerio        | Hypocrea virens               | Trichoderma virens            |
|                   | Nematostella vectensis |                    | Necteria haematococca         | Talaromyces leycettanus       |

|  |                         |  |                         |                     |
|--|-------------------------|--|-------------------------|---------------------|
|  | Anopheles gambiae       |  | Gaeumannomyces graminis | Oidiodendron maius  |
|  | Caenorhabditis elegans  |  | Gibberella zeae         | Pleurotus ostreatus |
|  | Ciona intestinalis      |  |                         |                     |
|  | Drosophila melanogaster |  |                         |                     |

143

144

| Human Telomerase       | Bacterial ChitinaseA1              | Human Chitotriosidase1 | Amphibian XMAP215      | Rice Chitinase               |
|------------------------|------------------------------------|------------------------|------------------------|------------------------------|
| Homo sapiens           | Bacillus circulans                 | Homo sapiens           | Xenopus laevis         | Oryza sativa subsp. Japonica |
| Canis lupus familiaris | Paenibacillus polymyxa             | Pan troglodytes        | Xenopus tropicalis     | Ananas comosus               |
| Pan troglodytes        | Paenibacillus pabuli               | Mus musculus           | Homo sapiens           | Citrus sinensis              |
| Bos taurus             | Paenibacillus taichungensis        | Bos taurus             | Pan troglodytes        | Bambusa oldhamii             |
| Mus musculus           | Paenibacillus xylanexedens         | Canis lupus familiaris | Gallus gallus          | Daucus carota                |
| Gallus gallus          | Kurthia zopfii                     | Gallus gallus          | Anolis carolinensis    | Arachis duranensis           |
| Anolis carolinensis    | Paenibacillus tuaregi              | Danio rerio            | Canis familiaris       | Camellia sinensis            |
| Xenopus tropicalis     | Paenibacillus barengoltzii         | Xenopus tropicalis     | Bos taurus             | Corchorus olitorius          |
| Takifugu rubripes      | Paenibacillus rubinfantis          | Takifugu rubripes      | Mus musculus           | Drosera adelae               |
| Tetraodon nigroviridis | Paenibacillus senegalimassiliensis | Anolis carolinensis    | Danio rerio            | Hevea brasiliensis           |
| Danio rerio            | Brevibacillus brevis               |                        | Takifugu rubripes      | Brassica rapa                |
|                        | Brevibacillus laterosporus         |                        | Branchiostoma floridae | Vitis vinifera               |
|                        |                                    |                        | Tetraodon nigroviridis | Arabidopsis halleri          |
|                        |                                    |                        |                        | Coffea canephora             |

|  |  |  |  |                |
|--|--|--|--|----------------|
|  |  |  |  | Pinus contorta |
|--|--|--|--|----------------|

145

146

147 **Table S3**

148

149 Typical catalysis times of processive cellulases (which limits dissociation time of the enzyme, given  
 150 in s) were collected from the literature (references are given in the main text). Parameters are given  
 151 for different types of substrates (e.g. amorphous cellulose or oligosaccharide) where the  
 152 corresponding values were available. CD: Catalytic domain, CBM: cellulose binding module.

153

154

| UniProt ID | Name    | CD family | Substrate type      |                     |                                              |                               |
|------------|---------|-----------|---------------------|---------------------|----------------------------------------------|-------------------------------|
|            |         |           | Amorphous Cellulose | Bacterial Cellulose | Plant Crystalline Cellulose                  | Oligosaccharides              |
| P62694     | TrCel7A | GH7       | 0.556 s             | 0.357s              | 9.836 s (0.2 μM Cellulose I <sub>α</sub> )   |                               |
|            |         |           |                     |                     | 2.985 s (0.2 μM Cellulose III <sub>h</sub> ) |                               |
|            |         |           |                     |                     | 3.209 s (0.1 μM Cellulose I <sub>α</sub> )   |                               |
|            |         |           |                     |                     | 3.774 s (0.1 μM Cellulose III <sub>h</sub> ) |                               |
| P07987     | TrCel6A | GH6       |                     |                     | 0.323 s (Cellulose I <sub>α</sub> )          | 16.216 s (Glc3)               |
|            |         |           |                     |                     |                                              | 0.269 s (Glc4)                |
| Q09431     | PcCel7D | GH7       | 0.5 s               | 0.385 s             |                                              |                               |
| A7WNT9     | ActCbh1 | GH7       |                     |                     |                                              | 0.531 s (CNPLac)              |
|            |         |           |                     |                     |                                              | 21.429 s (MULac)              |
| Q9C1S9     | Avi2    | GH6       | 0.019 s (pH 8.5)    |                     |                                              | 0.012 s (Cellohexaose pH 8.5) |
|            |         |           | 0.167 s (pH 9.5)    |                     |                                              | 0.125 s (Cellohexaose pH 9.5) |

155

156 **Table S4**

157 DLD processive enzymes move along different polymeric substrate and take various steps. The  
 158 length of the elementary unit that is covered by one step of the processive enzyme is named (in

159 parentheses) and its typical length (unit size) is calculated from the geometry of the substrate; this  
 160 length is taken as the step size for the given enzyme. The linker length distribution (mean  $\pm$  SD, cf.  
 161 Suppl. Figure S2) is calculated for the enzyme family (cf. Suppl. Table S2 for species considered).

162

163

| Substrate (unit)         | Enzyme                                          | Linker length (mean $\pm$ SD) | Unit size                        |
|--------------------------|-------------------------------------------------|-------------------------------|----------------------------------|
| RNA (nucleotide)         | <i>Human RNAse H1</i>                           | 44.9 $\pm$ 10.8               | 0.34 nm                          |
| DNA (nucleotide)         | <i>Human XPF</i>                                | 22.2 $\pm$ 0.4                | 0.34 nm                          |
| Cellulose (cellobiose)   | <i>T. reesei Cel7A</i>                          | 33.9 $\pm$ 5.4                | 1 nm                             |
|                          | <i>H. insolens Cel6A</i>                        | 38.6 $\pm$ 10.3               |                                  |
| Telomer (hexanucleotide) | <i>Human Telomerase</i>                         | 107.0 $\pm$ 57.6              | 2.04 nm (0.34 nm/base pair)      |
| Tubulin (tubulin dimer)  | <i>Xenopus XMAP215</i>                          | 94.1 $\pm$ 17.3               | 4 nm                             |
| Chitin (trisacharid)     | <i>Human Chitotriosidase-1</i>                  | 36.1 $\pm$ 6.6                | 1.5 nm (derived from cellobiose) |
|                          | <i>Bacillus circulans Chitinase A1</i>          | 22.3 $\pm$ 0.9                |                                  |
|                          | <i>Oryza sativa subsp. Japonica Chitinase 2</i> | 21.9 $\pm$ 3.9                |                                  |
|                          |                                                 |                               |                                  |
| Collagen (decapeptide*)  | <i>Human MMP9</i>                               | 69.6 $\pm$ 23.7               | 2.8 nm                           |

164

165 \*for MMP9, the frequency of the consensus cleavage motif (P..HyS/T) in the substrate collagen is

166 found to occur at about every tenth residue

167

## 168 References

169 1. Czovek, A., G.J. Szollosi, and I. Derenyi, The relevance of neck linker docking in the motility of  
 170 kinesin. *Biosystems*, **2008**. *93*: 29-33.

171 2. Gao, D., et al., Increased enzyme binding to substrate is not necessary for more efficient cellu-  
 172 lose hydrolysis. *Proc Natl Acad Sci U S A*, **2013**. *110*: 10922-7.

173 3. Bois, J., *Rudiments of polymer physics*. 2002: <http://www.citeulike.org/user/norris/article/2086610>.

174 4. Holehouse, A.S., et al., CIDER: Resources to Analyze Sequence-Ensemble Relationships of In-  
 175 trinsically Disordered Proteins. *Biophys J*, **2017**. *112*: 16-21.

176
